# Supplementary material
Source: publisher site journal article supplement (https://www.dovepress.com/article/436457)
Supplement: Supplementary file 1 [file get_supplementary_file.php]

**Table S1** Search strategy of the bibliometrics.

| <b>Item</b> | <b>Search strategy</b>                                                                                                                                                                                                                                                                                                                                                                                                                                                                   |
|-------------|------------------------------------------------------------------------------------------------------------------------------------------------------------------------------------------------------------------------------------------------------------------------------------------------------------------------------------------------------------------------------------------------------------------------------------------------------------------------------------------|
| #1          | TS=(“Traditional Chinese exercise”) OR TS=(“Qigong”) OR TS=(“Qi Gong”) OR TS=(“Ch’i Kung”) OR TS=(“Tai Ji”) OR TS=(“Tai-ji”) OR TS=(“Tai Chi”) OR TS=(“Chi, Tai”) OR TS=(“Tai Ji Quan”) OR TS=(“Ji Quan, Tai”) OR TS=(“Quan, Tai Ji”) OR TS=(“Taiji”) OR TS=(“Taijiquan”) OR TS=(“T’ai Chi”) OR TS=(“Tai Chi Chuan”) OR TS=(“yijinjing”) OR TS=(“Yi jin jing”) OR TS=(“Baduanjin”) OR TS=(“Ba duan jin”) OR TS=(“wuqiangxi”) OR TS=(“Wu qin xi”) OR TS=(“liuzikun”) OR TS=(“liu zi jue”) |
| #2          | TI=(Osteoarthritis)                                                                                                                                                                                                                                                                                                                                                                                                                                                                      |
| #3          | #1 AND #2                                                                                                                                                                                                                                                                                                                                                                                                                                                                                |

**Publication Date:** 2003-01-01 to 2022-12-31 **Edition:** Science Citation Index Expanded (SCI-EXPANDED)--1900-present

**Table S2** Exercise prescription of TCE for OA in each RCTs.

| <b>TCE Type</b> | <b>Frequency</b>            | <b>Duration</b> | <b>Disease</b>                | <b>Efficacy</b>                                                                                                                                                                         | <b>Source</b> |
|-----------------|-----------------------------|-----------------|-------------------------------|-----------------------------------------------------------------------------------------------------------------------------------------------------------------------------------------|---------------|
| Tai Chi         | 3 times a week              | 24 weeks        | KOA                           | Improve sleep quality                                                                                                                                                                   | 1             |
| Tai Chi         | 3 times a week              | 24 weeks        | KOA                           | Improve abnormal gait and relieve pain                                                                                                                                                  | 2             |
| Tai Chi         | 2 times a week              | 10 weeks        | KOA                           | Improve activity ability                                                                                                                                                                | 3             |
| Tai Chi         | 3 times a week              | 24 weeks        | KOA                           | Improve proprioceptive sensation                                                                                                                                                        | 4             |
| Tai Chi         | 5 times a week              | 12 weeks        | Primary TKA for end-stage KOA | Improve physical function and quality of life                                                                                                                                           | 5             |
| Tai Chi         | 5 times a week              | 12 weeks        | KOA                           | Modulate the rsFC of the descending opioidergic pathway and reward/motivation system and blood inflammation markers; modulate both common and unique DLPFC (cognitive control) pathways | 6             |
| Tai Chi         | 2 times a week              | 24 weeks        | KOA                           | Change the pattern of plantar load                                                                                                                                                      | 7             |
| Tai Chi         | 2 times a week              | 12 weeks        | KOA                           | Improve function, quality of life and depressive symptoms                                                                                                                               | 8             |
| Tai Chi         | 3 times a week              | 12 weeks        | KOA                           | Improve pain and function, but improve symptoms disappear after training                                                                                                                | 9             |
| Tai Chi         | Not fixed, encouraged daily | 24 weeks        | OA                            | Increased knee extensor endurance and bone mineral density, and reduced patients' fear of falling during daily activities                                                               | 10            |
| Tai Chi         | 3 times a week              | 12 weeks        | KOA                           | Improve the physical function and quality of life of KOA in elderly women                                                                                                               | 11            |
| Tai Chi         | 2 times a week              | 12 weeks        | KOA                           | Effectively reduce pain, stiffness, fear of falling, it improves balance, rise time, and knee movement                                                                                  | 12            |
| Tai Chi         | 2 times a week              | 12 weeks        | KOA                           | Improve balance function and improve quality of life                                                                                                                                    | 13            |

|                 |                                |          |                             |                                                                                                                                                                                         |    |
|-----------------|--------------------------------|----------|-----------------------------|-----------------------------------------------------------------------------------------------------------------------------------------------------------------------------------------|----|
| Tai Chi         | 2 times a week                 | 12 weeks | OA                          | Relieve pain and improve body function                                                                                                                                                  | 14 |
| Tai Chi         | 2 times a week                 | 12 weeks | KOA                         | Improve their arthritis symptoms, balance and physical function                                                                                                                         | 15 |
| Tai Chi         | 2 times a week                 | 12 weeks | symptomatic tibiofemoral OA | Improve physical function, self-efficacy, depression and health-related quality of life in patients with knee joint OA                                                                  | 16 |
| Baduanjin       | 3 times a week                 | 12 weeks | KOA                         | Improve the proprioceptive and postural stability of the knee joint and reduce pain, stiffness and dysfunction                                                                          | 17 |
| Baduanjin       | 5 times a week                 | 8 weeks  | KOA                         | It relieves pain, stiffness and disability, and helps to improve quadriceps strength and aerobic ability                                                                                | 18 |
| Baduanjin       | 3 times a week                 | 12 weeks | KOA                         | Adjust posture control                                                                                                                                                                  | 19 |
| Baduanjin       | 5 times a week                 | 12 weeks | KOA                         | Modulate the rsFC of the descending opioidergic pathway and reward/motivation system and blood inflammation markers; modulate both common and unique DLPFC (cognitive control) pathways | 6  |
| Wuqinxi         | 4 times a week                 | 24 weeks | KOA                         | Increase muscle strength, relieve pain and improve balance                                                                                                                              | 20 |
| External Qigong | 5 or 6 times every three weeks | 3 weeks  | KOA                         | Relieve pain and improve negative mood                                                                                                                                                  | 21 |

**Abbreviations:** KOA, knee osteoarthritis; OA: osteoarthritis; TCE, traditional Chinese exercise; TKA, total knee arthroplasty

### Reference

1. Lü J, Huang L, Wu X, Fu W, Liu Y. Effect of Tai Ji Quan training on self-reported sleep quality in elderly Chinese women with knee osteoarthritis: a randomized controlled trial. *Sleep medicine*. 2017;33:70-75.
2. Zhu Q, Huang L, Wu X, et al. Effects of Tai Ji Quan training on gait kinematics in older Chinese women with knee osteoarthritis: A randomized controlled trial. *Journal of sport and health science*. 2016;5(3):297-303.
3. Wortley M, Zhang S, Paquette M, et al. Effects of resistance and Tai Ji training on mobility and symptoms in knee osteoarthritis patients. *Journal of Sport Health Science*.

- 2013;2(004):209-214.
4. Zhu Q, Huang L, Wu X, et al. Effect of Taijiquan practice versus wellness education on knee proprioception in patients with knee osteoarthritis: a randomized controlled trial. *Journal of traditional Chinese medicine*. 2017;37(6):774-781.
  5. Li L, Cheng S, Wang G, Duan G, Zhang Y. Tai chi chuan exercises improve functional outcomes and quality of life in patients with primary total knee arthroplasty due to knee osteoarthritis. *Complementary therapies in clinical practice*. 2019;35:121-125.
  6. Liu J, Chen L, Chen X, et al. Modulatory effects of different exercise modalities on the functional connectivity of the periaqueductal grey and ventral tegmental area in patients with knee osteoarthritis: a randomised multimodal magnetic resonance imaging study. *British journal of anaesthesia*. 2019;123(4):506-518.
  7. Zhang Z, Huang L, Liu Y, Wang L. Effect of Tai Chi Training on Plantar Loads during Walking in Individuals with Knee Osteoarthritis. *BioMed research international*. 2020;2020:3096237.
  8. Wang C, Schmid CH, Iversen MD, et al. Comparative Effectiveness of Tai Chi Versus Physical Therapy for Knee Osteoarthritis: A Randomized Trial. *Annals of internal medicine*. 2016;165(2):77-86.
  9. Brismée JM, Paige RL, Chyu MC, et al. Group and home-based tai chi in elderly subjects with knee osteoarthritis: a randomized controlled trial. *Clinical rehabilitation*. 2007;21(2):99-111.
  10. Song R, Roberts BL, Lee EO, Lam P, Bae SC. A randomized study of the effects of t'ai chi on muscle strength, bone mineral density, and fear of falling in women with osteoarthritis. *Journal of alternative and complementary medicine (New York, NY)*. 2010;16(3):227-233.
  11. Song J, Wei L, Cheng K, et al. The Effect of Modified Tai Chi Exercises on the Physical Function and Quality of Life in Elderly Women With Knee Osteoarthritis. *Frontiers in aging neuroscience*. 2022;14:860762.
  12. Lee HY, Lee KJ. [Effects of Tai Chi exercise in elderly with knee osteoarthritis]. *Taehan Kanho Hakhoe chi*. 2008;38(1):11-18.
  13. Chen PY, Song CY, Yen HY, et al. Impacts of tai chi exercise on functional fitness in community-dwelling older adults with mild degenerative knee osteoarthritis: a randomized controlled clinical trial. *BMC geriatrics*. 2021;21(1):449.
  14. Fransen M, Nairn L, Winstanley J, Lam P, Edmonds J. Physical activity for osteoarthritis management: a randomized controlled clinical trial evaluating hydrotherapy or Tai Chi classes. *Arthritis and rheumatism*. 2007;57(3):407-414.
  15. Song R, Lee EO, Lam P, Bae SC. Effects of tai chi exercise on pain, balance, muscle strength, and perceived difficulties in physical functioning in older women with osteoarthritis: a randomized clinical trial. *The Journal of rheumatology*. 2003;30(9):2039-2044.
  16. Wang C, Schmid CH, Hibberd PL, et al. Tai Chi is effective in treating knee osteoarthritis: a randomized controlled trial. *Arthritis and rheumatism*. 2009;61(11):1545-1553.
  17. Ye J, Simpson MW, Liu Y, et al. The Effects of Baduanjin Qigong on Postural Stability, Proprioception, and Symptoms of Patients With Knee Osteoarthritis: A Randomized Controlled Trial. *Frontiers in medicine*. 2019;6:307.
  18. An B, Dai K, Zhu Z, et al. Baduanjin alleviates the symptoms of knee osteoarthritis. *Journal of alternative and complementary medicine (New York, NY)*. 2008;14(2):167-174.

19. Ye J, Zheng Q, Zou L, et al. Mindful Exercise (Baduanjin) as an Adjuvant Treatment for Older Adults (60 Years Old and Over) of Knee Osteoarthritis: A Randomized Controlled Trial. *Evidence-based complementary and alternative medicine : eCAM*. 2020;2020:9869161.
20. Xiao C, Zhuang Y, Kang Y. Effects of Wu Qin xi Qigong exercise on physical functioning in elderly people with knee osteoarthritis: A randomized controlled trial. *Geriatrics & gerontology international*. 2020;20(10):899-903.
21. Chen KW, Perlman A, Liao JG, Lam A, Staller J, Sigal LH. Effects of external qigong therapy on osteoarthritis of the knee. A randomized controlled trial. *Clinical rheumatology*. 2008;27(12):1497-1505.

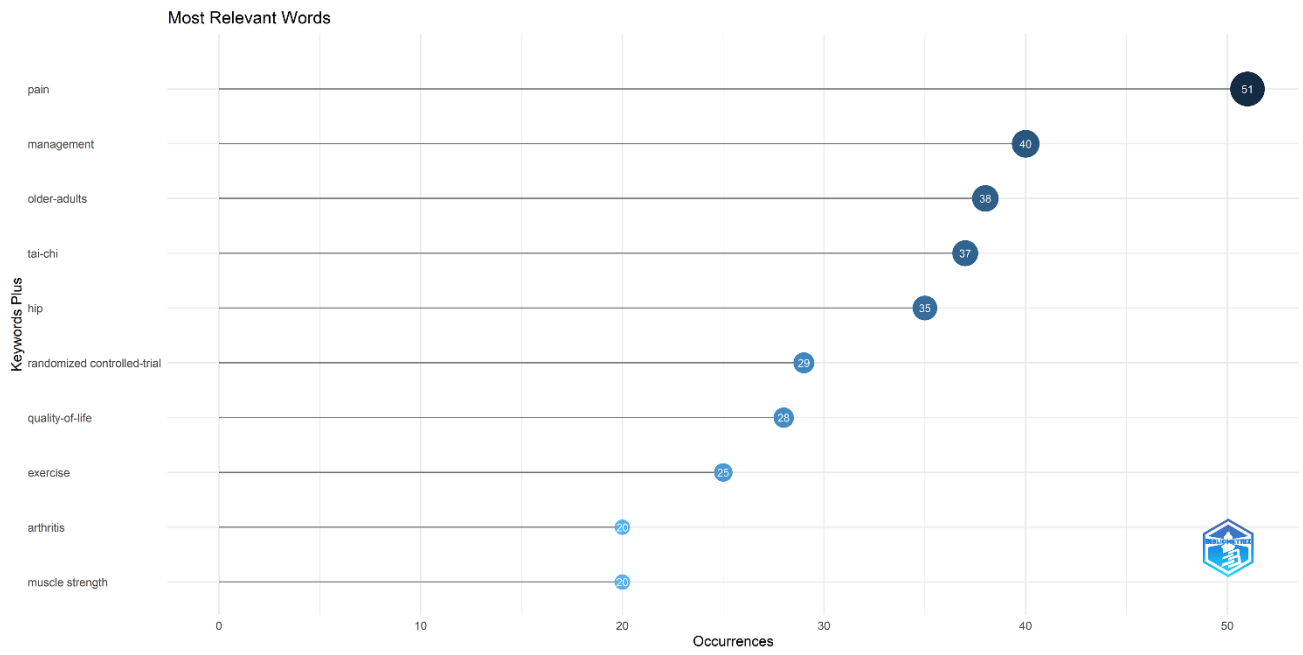

**Figure S1** The frequency of the top 10 keywords.

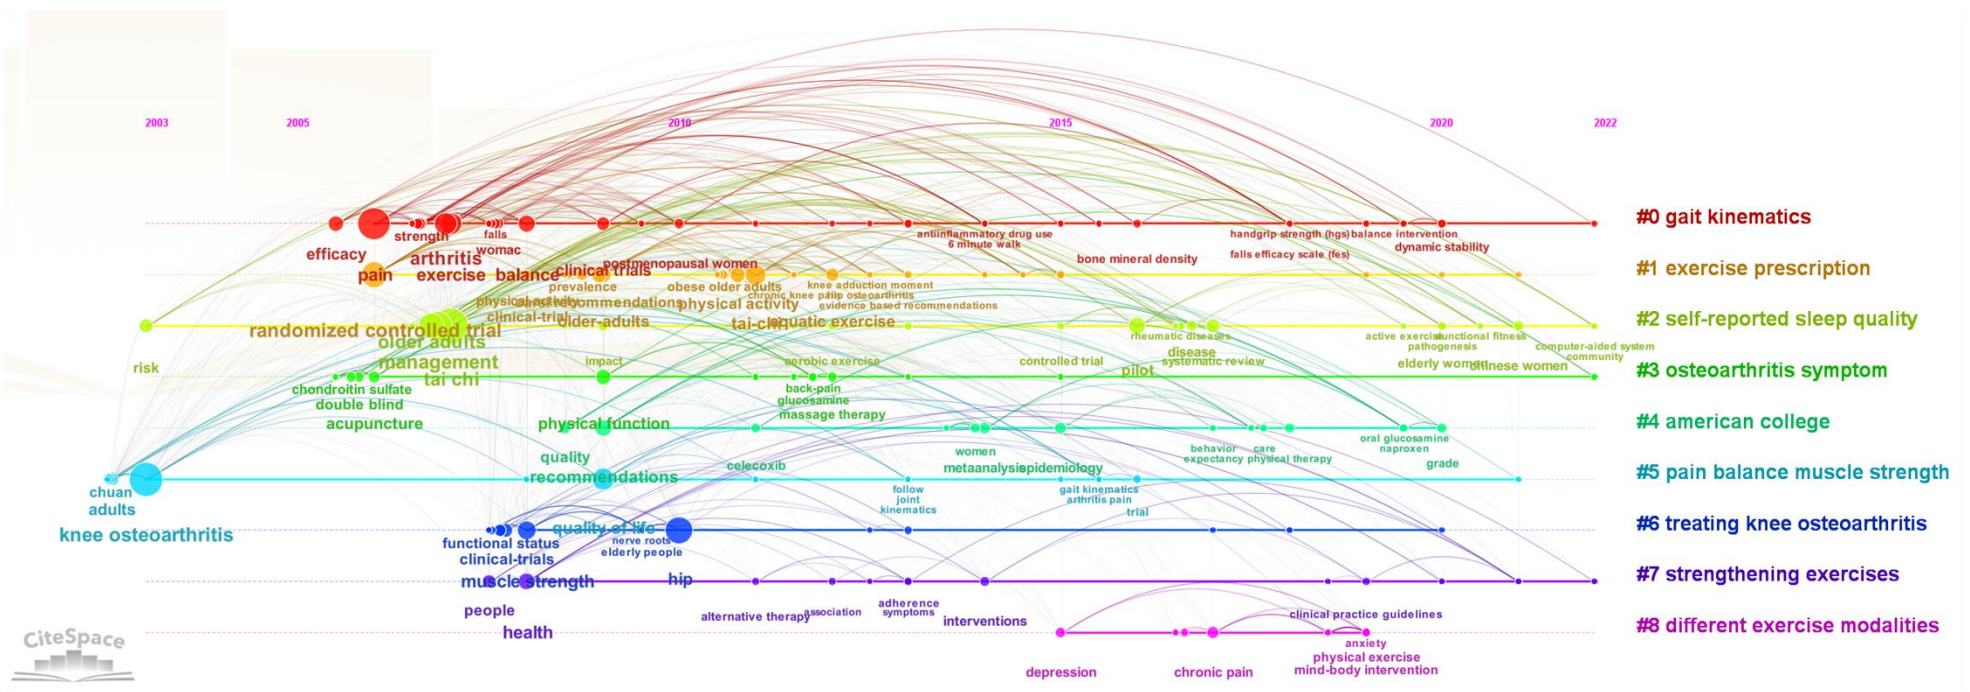

**Figure S2** The evolution of the main keywords in the past 20 years analyzed by the Timeview of CiteSpace.
